# Supplementary material for: Applied sports science and sports medicine in women’s rugby: systematic scoping review and Delphi study to establish future research priorities
Source: HighWire-hosted journal article supplement (doi:10.1136/bmjsem-2021-001287), 2022-07-01
Supplement: bmjsem-2021-001287supp002_data_supplement.pdf [file bmjsem-2021-001287supp002_data_supplement.pdf]

Supplementary Table 8. Expert-based sub-themes that did not reach consensus, median research priority (interquartile range) calculated from 5-point Likert scale, and percentage of expert agreement.

| Expert-based Theme | Sub-themes                                                                                     | Median Research Priority (IQR) | Low (%) | Medium (%) | High (%) |
|--------------------|------------------------------------------------------------------------------------------------|--------------------------------|---------|------------|----------|
| Female health      | Relationship between hormonal contraceptive use, training and performance                      | 4.0 (1.0)                      | 17      | 27         | 57       |
|                    | Pelvic health                                                                                  | 3.0 (1.0)                      | 13      | 50         | 37       |
|                    | Effects of the menstrual cycle and hormonal contraceptives on concussion testing and treatment | 3.0 (1.0)                      | 13      | 43         | 43       |
|                    | Use and decision-making process of hormonal contraceptive use                                  | 3.0 (1.0)                      | 23      | 40         | 37       |
|                    | Pregnancy and childbirth                                                                       | 3.0 (2.0)                      | 30      | 33         | 37       |
|                    | Breast health                                                                                  | 3.0 (1.8)                      | 33      | 30         | 27       |
|                    | Urinary incontinence                                                                           | 2.5 (1.0)                      | 50      | 33         | 17       |
|                    | Polycystic ovarian syndrome                                                                    | 3.0 (1.0)                      | 43      | 47         | 10       |
| Injury             | Strength profiling for high-risk areas (e.g., neck, shoulder)                                  | 4.0 (1.0)                      | 10      | 23         | 67       |
|                    | Recovery time-frames from specific injuries                                                    | 3.5 (1.0)                      | 13      | 33         | 53       |
|                    | Injury and wellness (e.g., sleep, stress, mood, soreness) relationship                         | 4.0 (1.0)                      | 10      | 33         | 57       |
|                    | Knowledge and attitudes of injury prevention                                                   | 3.0 (1.0)                      | 13      | 40         | 47       |
|                    | Strategies to optimise injury education of players and coaches                                 | 3.5 (1.0)                      | 13      | 37         | 50       |

|                       |                                                                                                                                                                                        |           |    |    |    |
|-----------------------|----------------------------------------------------------------------------------------------------------------------------------------------------------------------------------------|-----------|----|----|----|
|                       | Neuropsychological testing (e.g., memory, executive function, dementia) of players, and relationship to injury history                                                                 | 4.0 (1.0) | 20 | 23 | 57 |
|                       | Head acceleration kinematics                                                                                                                                                           | 3.0 (1.0) | 13 | 43 | 43 |
|                       | Nutritional strategies to reduce concussion risk                                                                                                                                       | 3.0 (1.0) | 33 | 43 | 23 |
| Match Characteristics | Relationship between match characteristics (e.g., total distance) and injury                                                                                                           | 4.0 (1.0) | 10 | 27 | 63 |
|                       | Relationship between match characteristics (e.g., running distance) and key performance indicators (e.g., tackle success, time spent attacking)                                        | 3.5 (1.0) | 13 | 37 | 50 |
|                       | Technical and tactical match-play characteristics (e.g., tackle, pass, decision-making)                                                                                                | 3.0 (1.0) | 13 | 47 | 40 |
|                       | Match characteristics e.g., total distance, high-speed running distance (incl. performance levels [e.g., junior, elite], positional differences, halves of play and changes over time) | 3.0 (1.0) | 17 | 47 | 37 |
|                       | Peak sequences in match-play (e.g., worst-case scenarios)                                                                                                                              | 3.0 (1.8) | 30 | 43 | 27 |
|                       | Physical characteristics (e.g., strength, speed, power) (incl. performance levels [e.g., junior, elite] and changes over time)                                                         | 4.0 (1.0) | 13 | 27 | 60 |
| Physical Performance  | Interventions (training, nutritional) to enhance performance (e.g., strength training to optimise ball-carrying)                                                                       | 4.0 (1.0) | 3  | 43 | 53 |
|                       | Preparation for tournament-play (e.g., short match turnaround in rugby world cups)                                                                                                     | 4.0 (1.0) | 10 | 33 | 57 |
|                       | Training adaptations (incl. positional differences)                                                                                                                                    | 4.0 (1.0) | 13 | 30 | 57 |

|            |                                                                                                                                                                             |           |    |    |    |
|------------|-----------------------------------------------------------------------------------------------------------------------------------------------------------------------------|-----------|----|----|----|
|            | Longitudinal wellness (e.g., sleep, stress), training load<br>(e.g., rating of perceived exertion) and physical<br>performance (e.g., strength)                             | 4.0 (1.0) | 13 | 33 | 53 |
|            | Difference in physical and performance characteristics<br>between women and transwomen                                                                                      | 3.5 (2.0) | 30 | 23 | 47 |
|            | Physiological profiles of women's rugby players (e.g.,<br>biochemical markers)                                                                                              | 3.0 (1.0) | 23 | 30 | 47 |
|            | Optimising microtechnology for female athletes (e.g.,<br>global positioning system [GPS] vests designed for<br>women's bodies, female-specific running speed<br>thresholds) | 3.0 (2.0) | 30 | 23 | 47 |
|            | Biomechanical effects (e.g., Q angle) on rugby<br>performance (e.g., tackle, scrum, jackal)                                                                                 | 3.0 (1.0) | 23 | 43 | 33 |
|            | Nutritional requirements and supplementation (incl.<br>performance levels [e.g., junior, elite])                                                                            | 3.0 (0.8) | 17 | 57 | 27 |
|            | Relationship between physical performance (e.g.,<br>lower body strength) and rugby (e.g., dominant tackle)                                                                  | 3.0 (2.0) | 30 | 37 | 33 |
|            | Reliability of microtechnology for rugby specific skills<br>(e.g., collisions, accelerations)                                                                               | 3.0 (1.0) | 23 | 47 | 30 |
|            | Anthropometric characteristics (e.g., body mass, bone<br>mineral density) (incl. levels of performance [e.g.,<br>junior, elite])                                            | 3.0 (1.0) | 17 | 57 | 27 |
|            | Transwomen participation in rugby                                                                                                                                           | 3.0 (2.0) | 33 | 23 | 43 |
|            | Reliability and validity of physical performance tests                                                                                                                      | 3.0 (1.8) | 30 | 43 | 27 |
|            | Residual training effect of physical characteristics (i.e.,<br>how long it takes to de-train)                                                                               | 2.0 (1.0) | 53 | 33 | 13 |
| Psychology | Psychological aspects of dual-career players                                                                                                                                | 4.0 (1.8) | 20 | 20 | 60 |

|                                                                              |           |    |    |    |
|------------------------------------------------------------------------------|-----------|----|----|----|
| Psychological demands of rugby                                               | 4.0 (1.0) | 7  | 33 | 60 |
| Optimising the relationship between (male) coaches and women's rugby players | 4.0 (1.0) | 13 | 30 | 57 |
| Psychological barriers to rugby participation                                | 4.0 (1.0) | 17 | 27 | 57 |
| Psychological aspects of post-rugby career players                           | 3.0 (1.0) | 17 | 33 | 50 |
| Mental toughness                                                             | 3.0 (2.0) | 33 | 33 | 33 |

IQR, interquartile range.
